# Supplementary material for: Serum Iron Overload Activates the SMAD Pathway and Hepcidin Expression of Hepatocytes via SMURF1
Source: PubMed Central journal article supplement — J Clin Transl Hepatol. 2024 Feb 4;12(3):227–35. doi: 10.14218/JCTH.2023.00440 (PMC10899870; doi:10.14218/jcth.2023.00440), 2024-02-04

**Figure 1**

**A Primary hepatocytes**

**repeat 1**

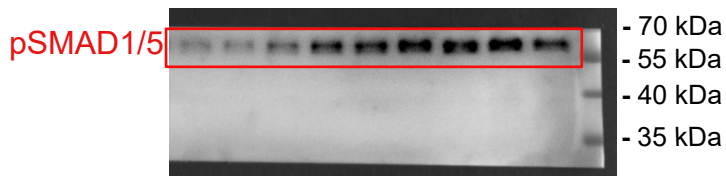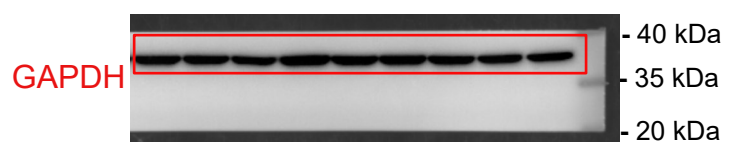

**repeat 2**

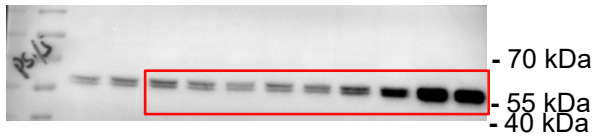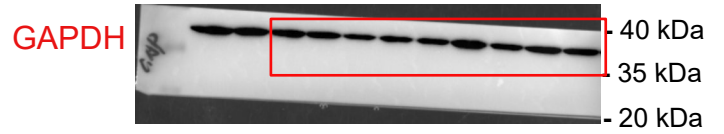

**HepG2 cells**

**repeat 1**

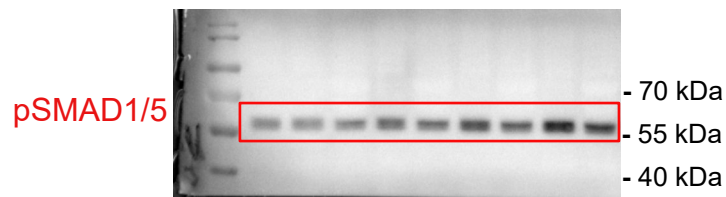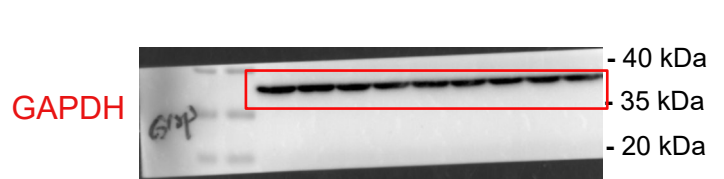

**repeat 2**

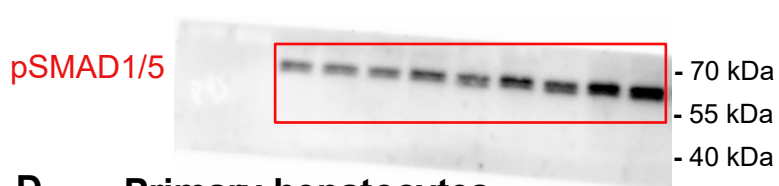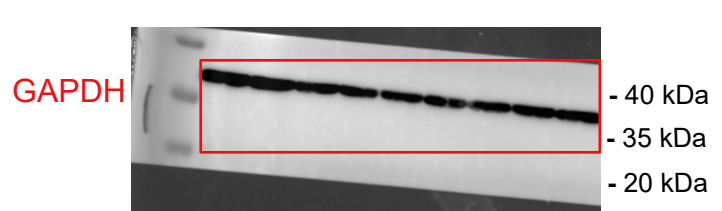

**D Primary hepatocytes**

**repeat 1**

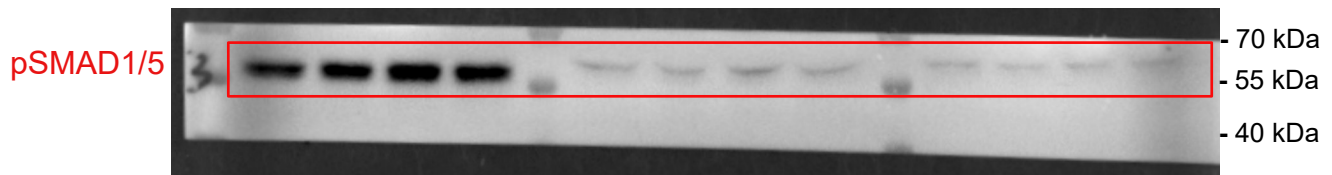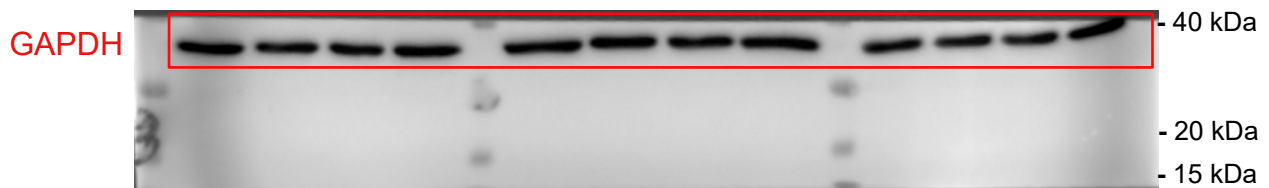

**repeat 2**

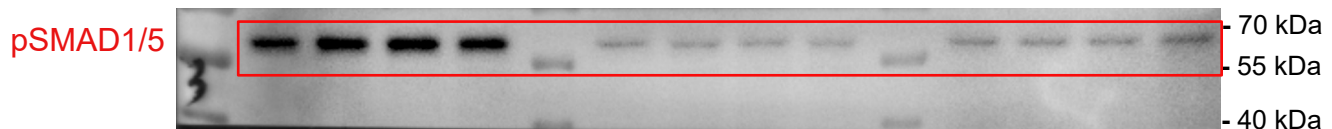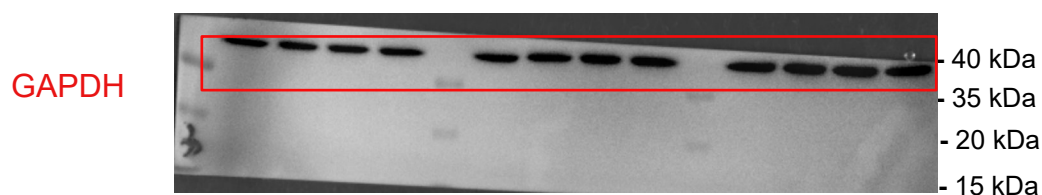

**repeat 3**

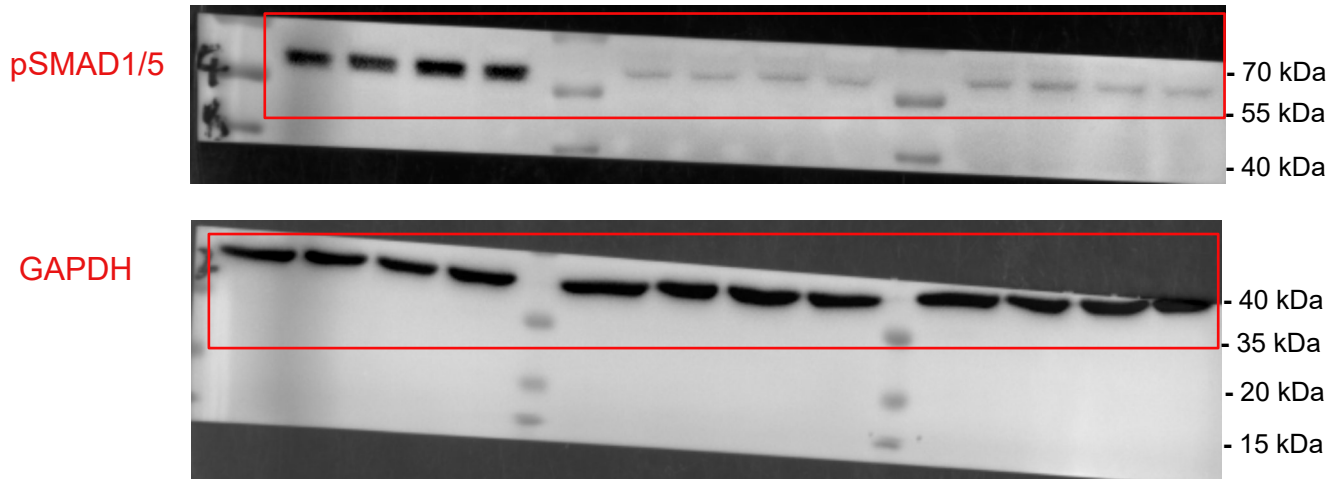

**HepG2 cells**

**repeat 1**

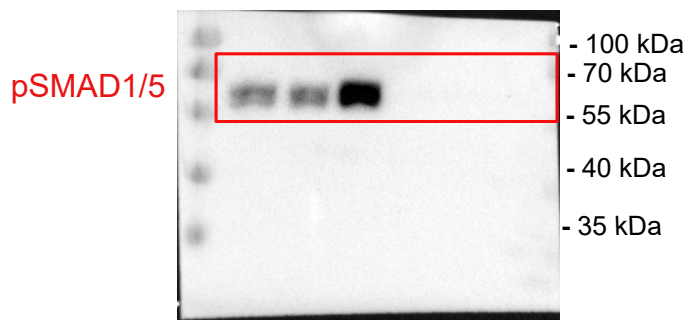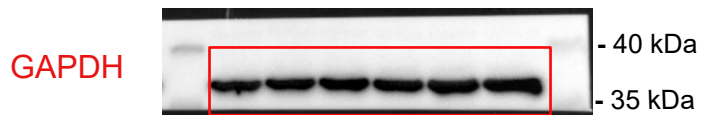

**repeat 2**

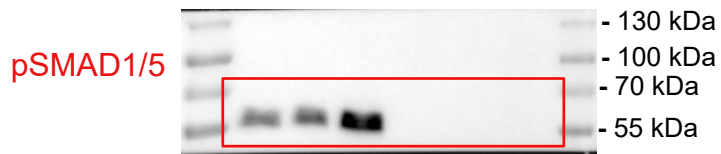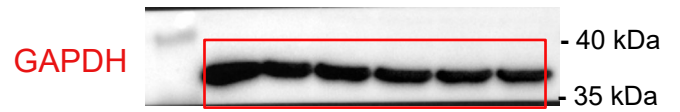

**E**

**repeat 1**

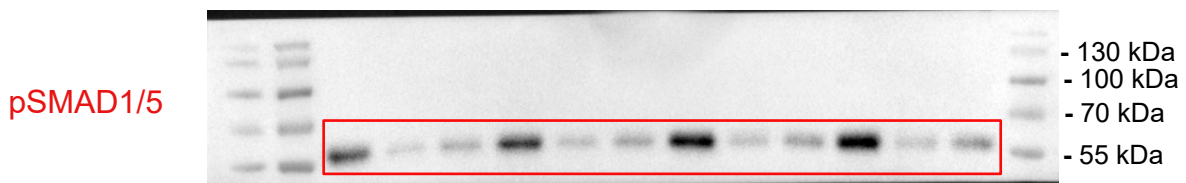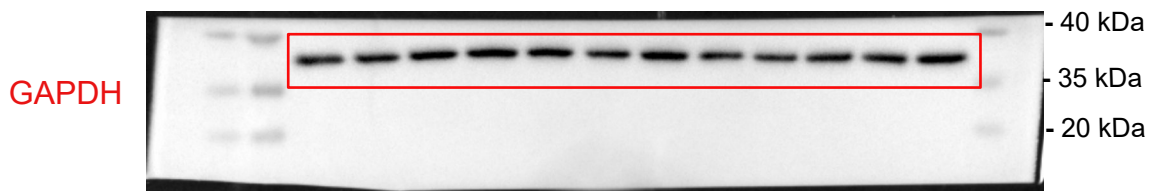

**repeat 2**

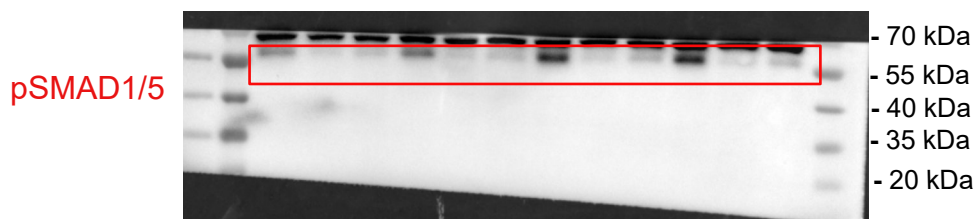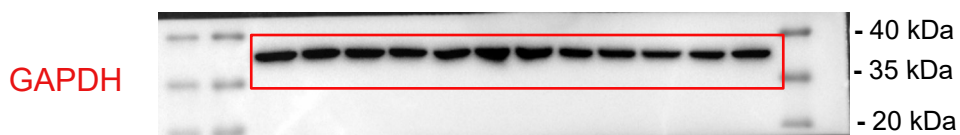

**Figure 2**

**A**

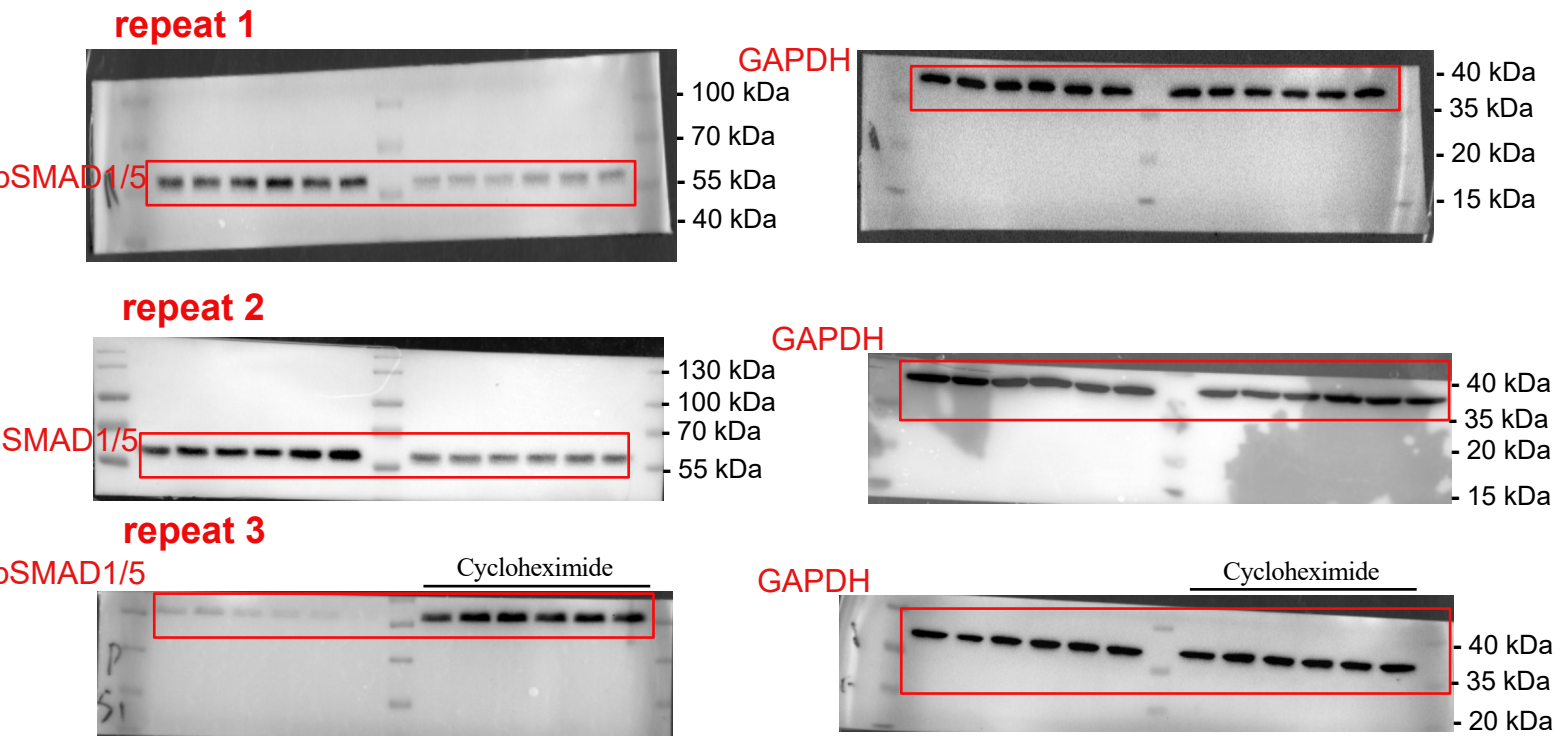

**B**

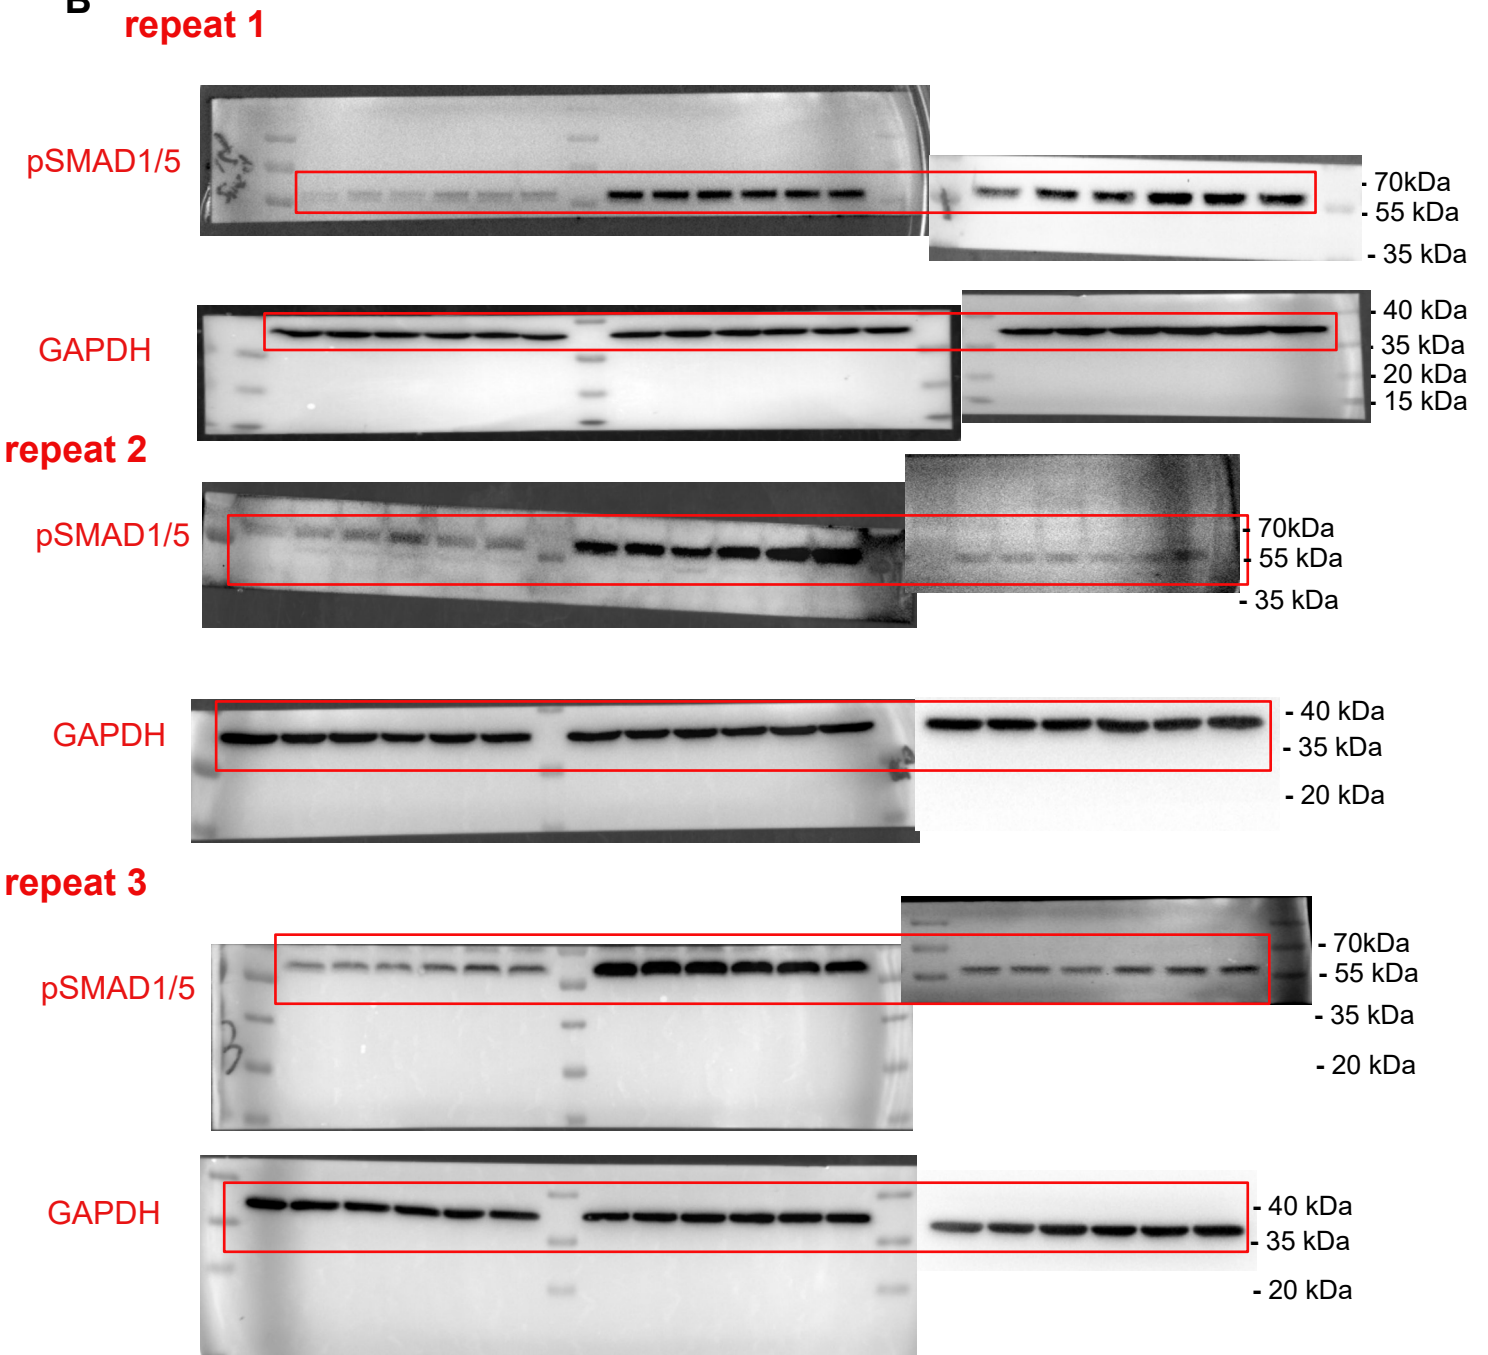

**C**

**repeat 1**

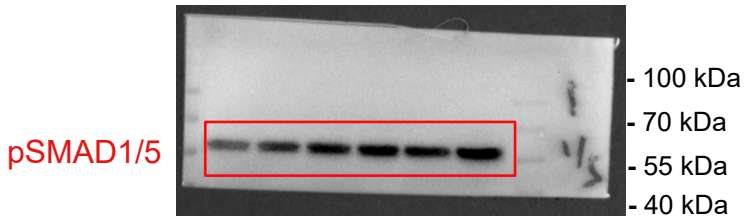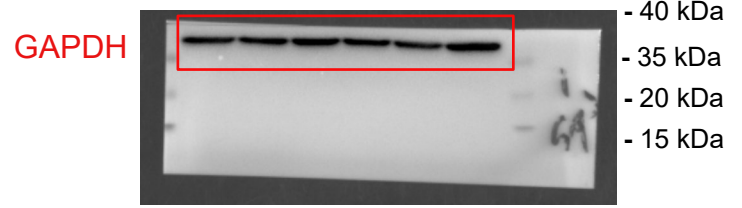

**repeat 2**

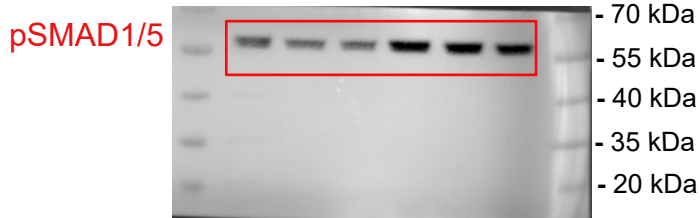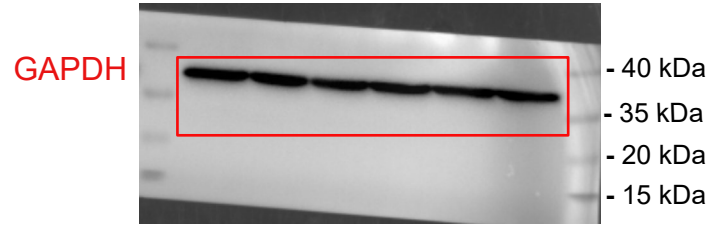

**repeat 3**

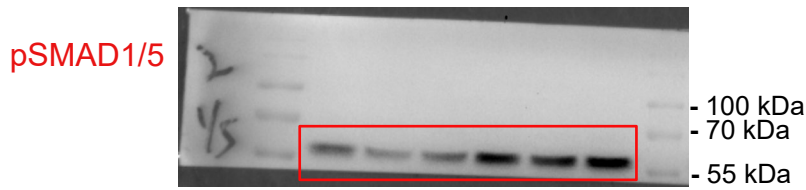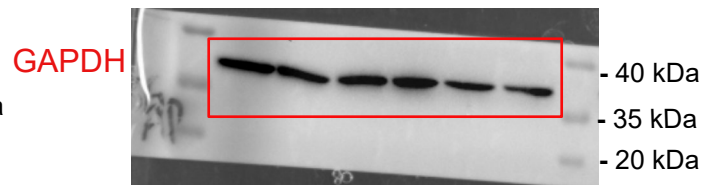

**Figure 3**

**A**

**repeat 1**

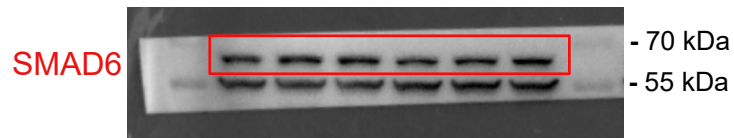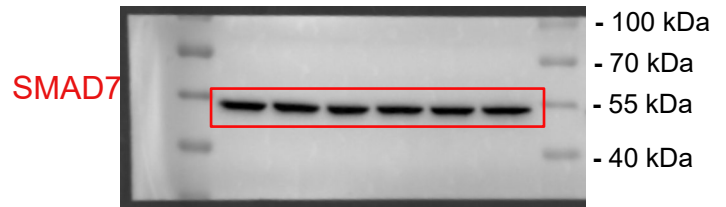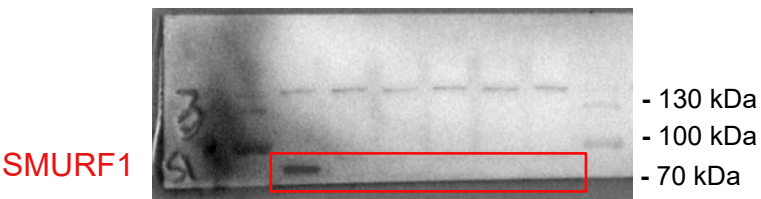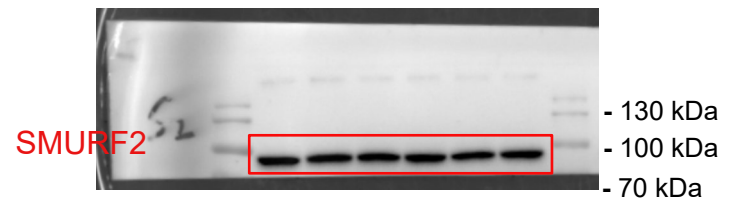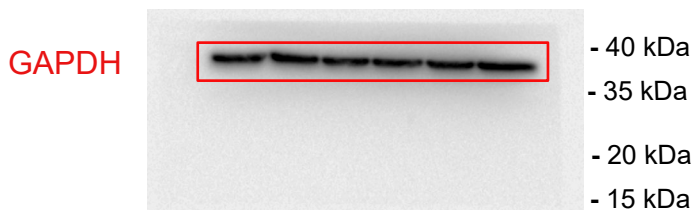

**repeat 2**

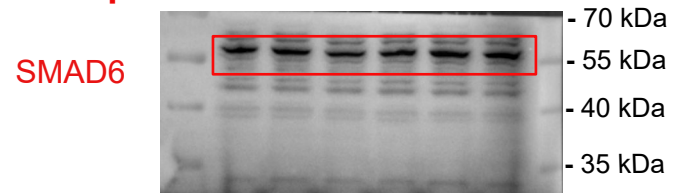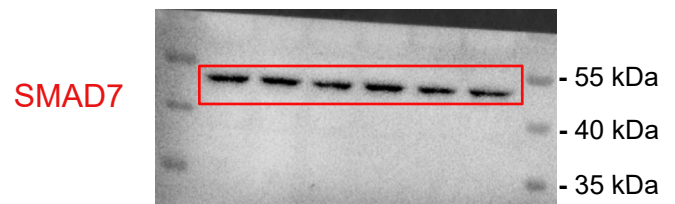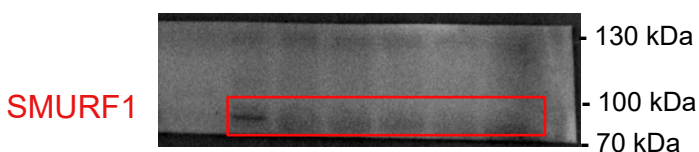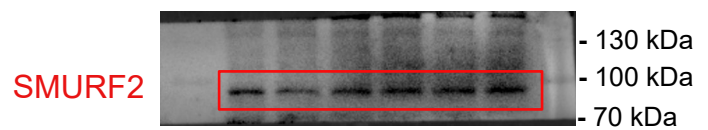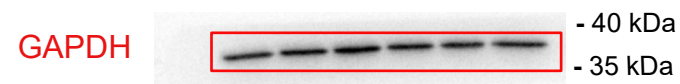

**repeat 3**

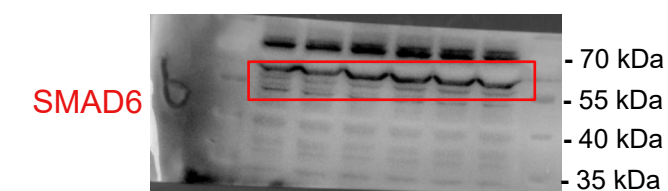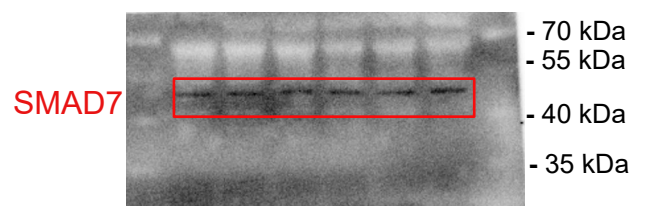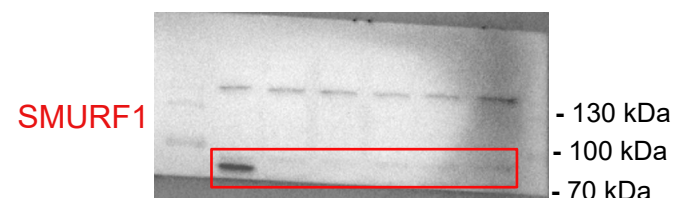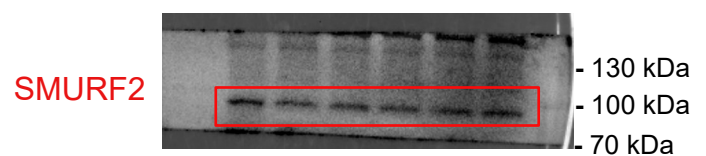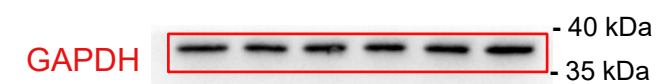

**B**

**repeat 1**

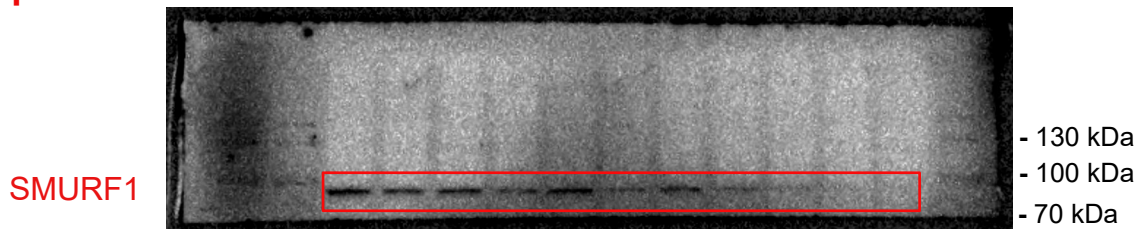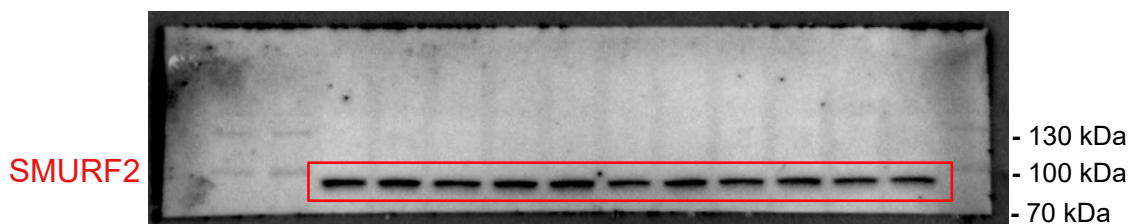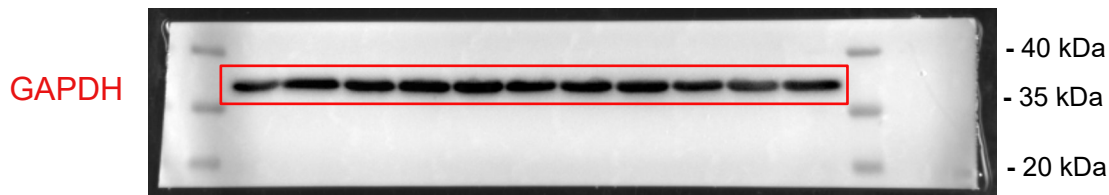

**repeat 2**

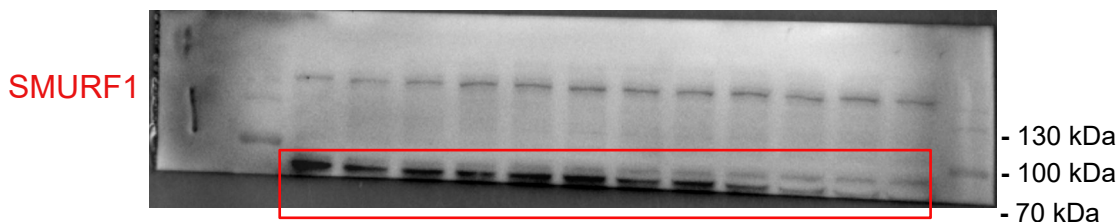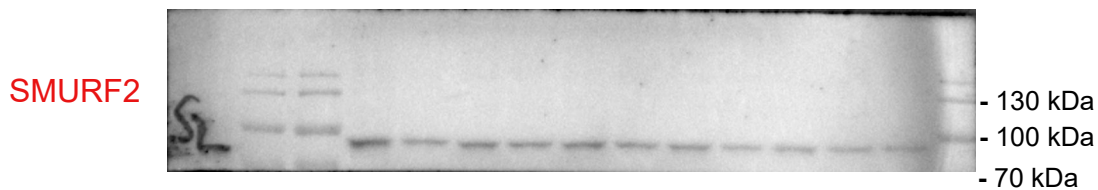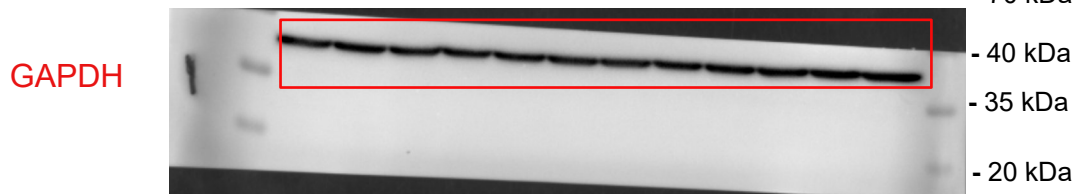

**repeat 3**

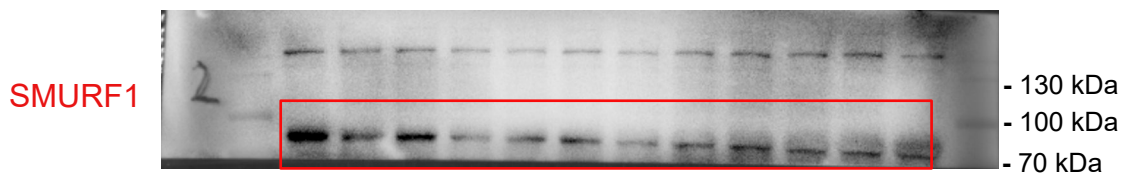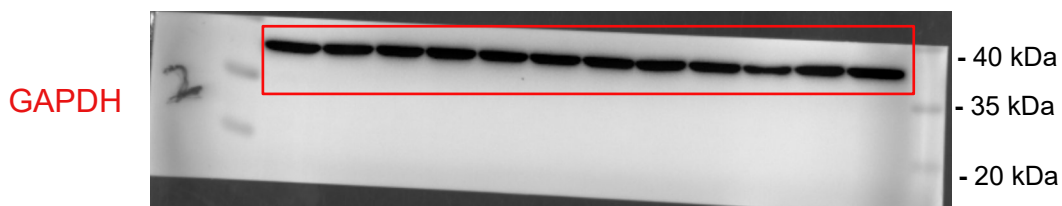

Holo-Tf (mg/mL) 2 1 0.5 0.25 0.125 0

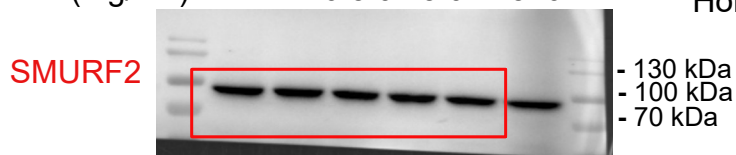

Holo-Tf (mg/mL) 2 1 0.5 0.25 0.125 0

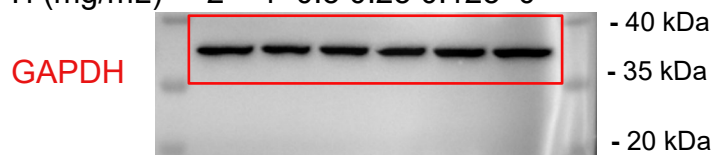

**C****repeat 1**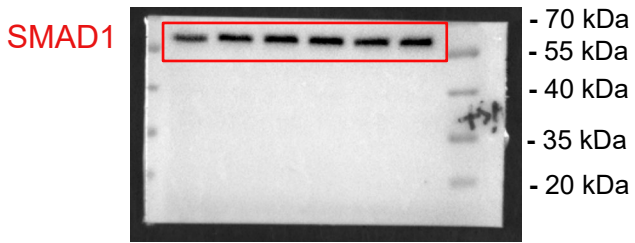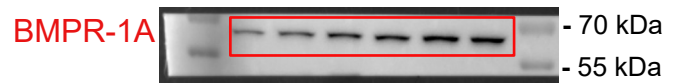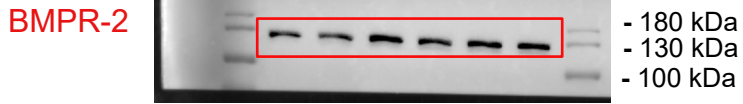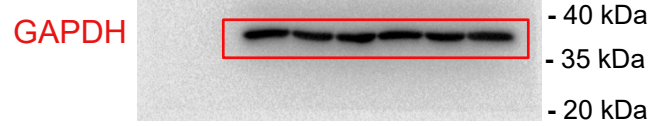**repeat 2**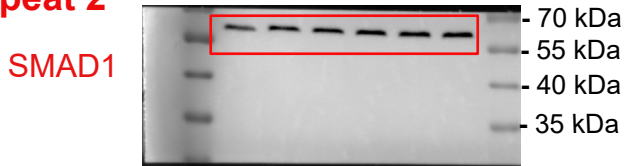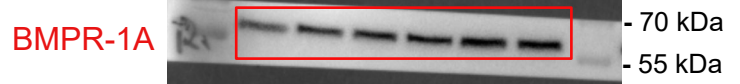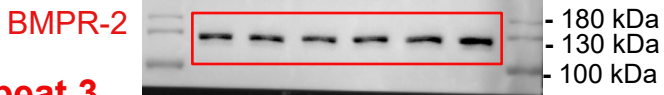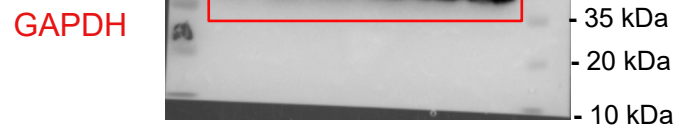**repeat 3**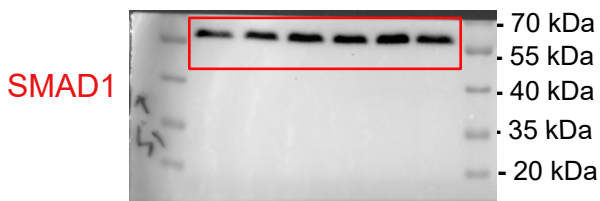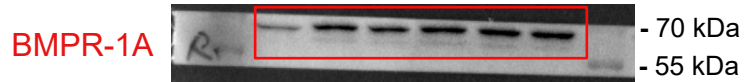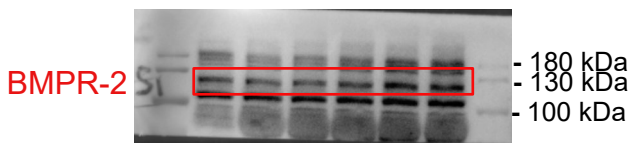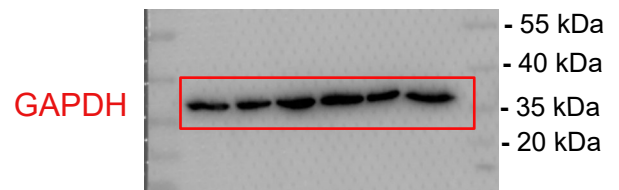**Figure 3****D****repeat 1**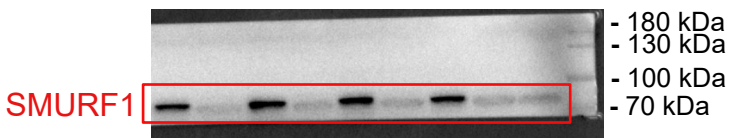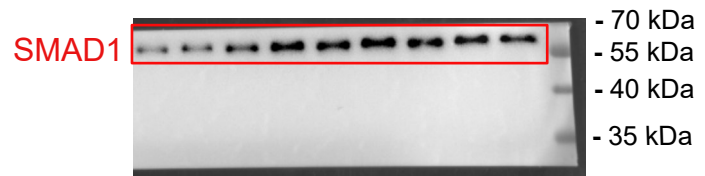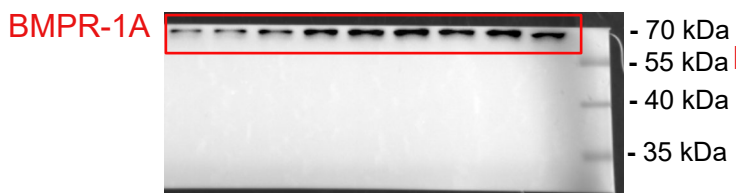**BMPR-2**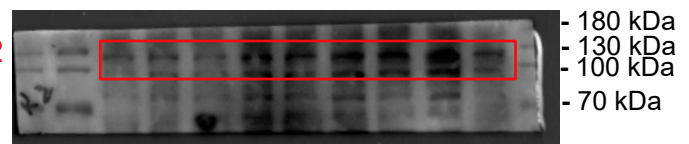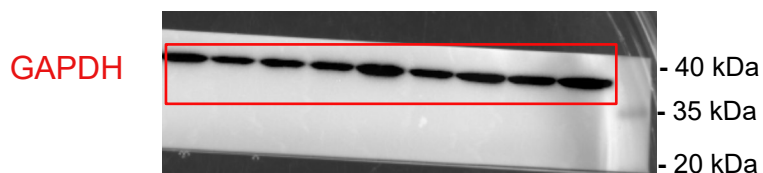

## repeat 2

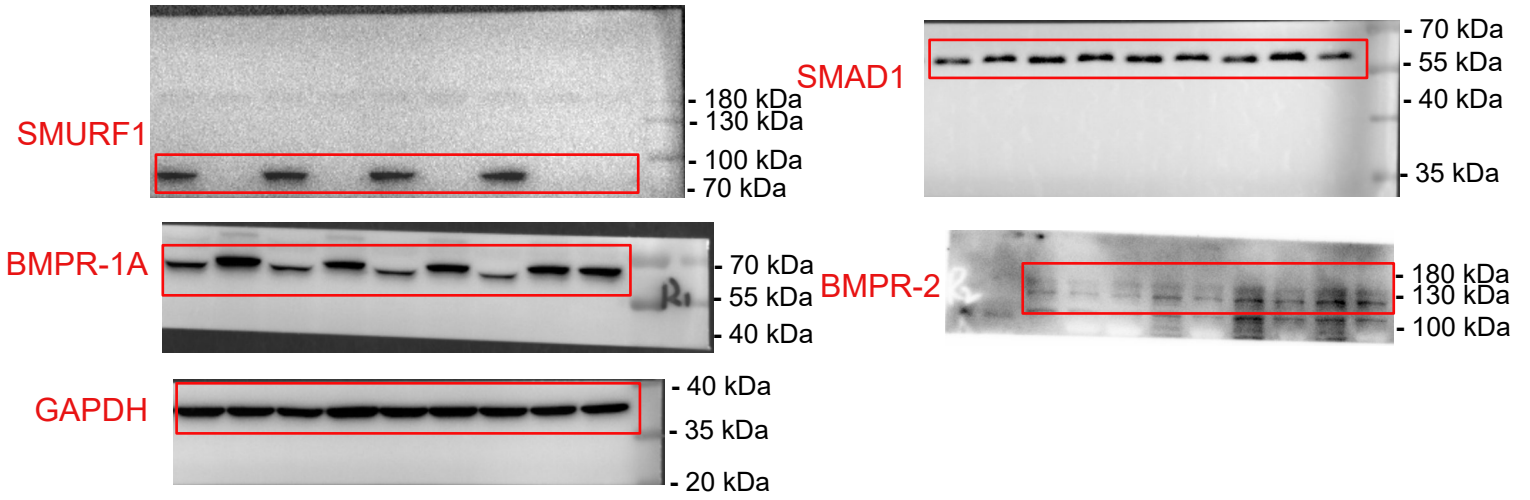

## repeat 3

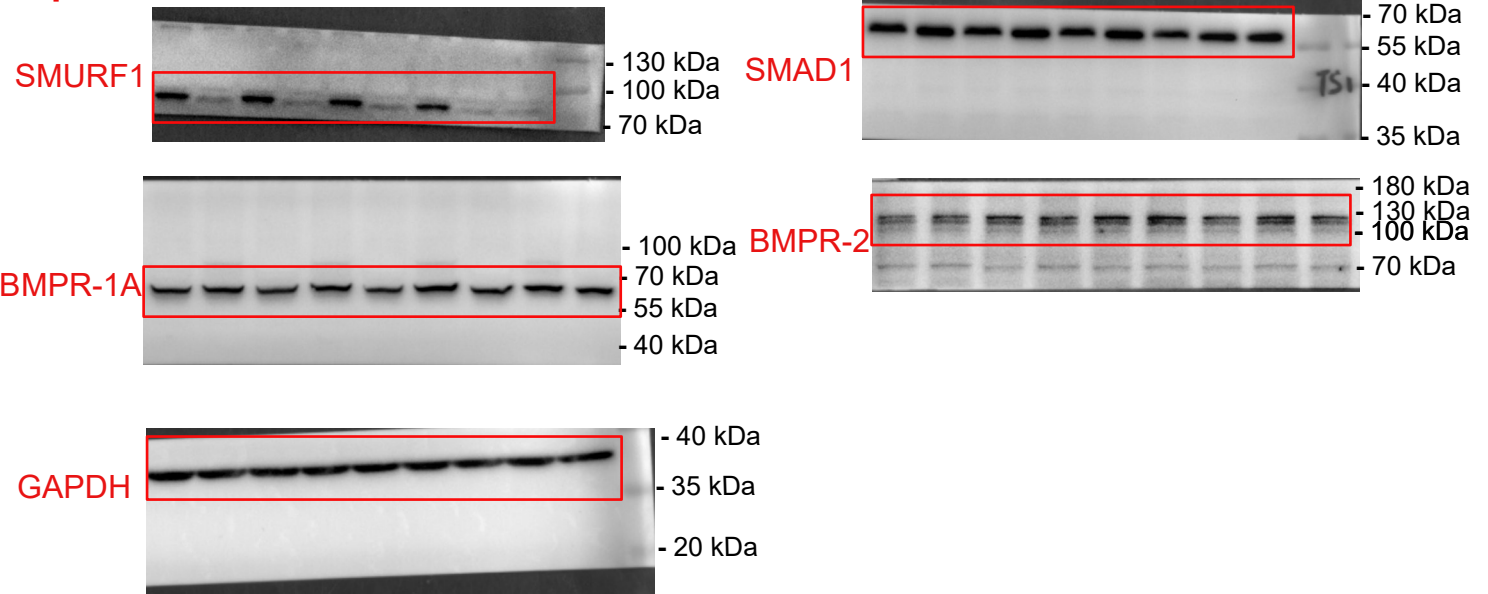

## E repeat 1

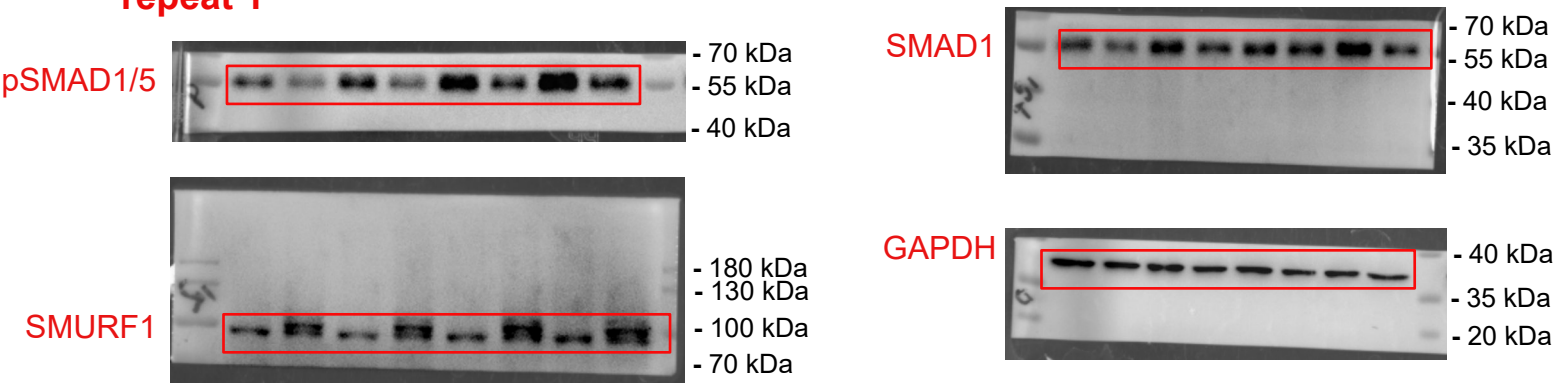

## repeat 2

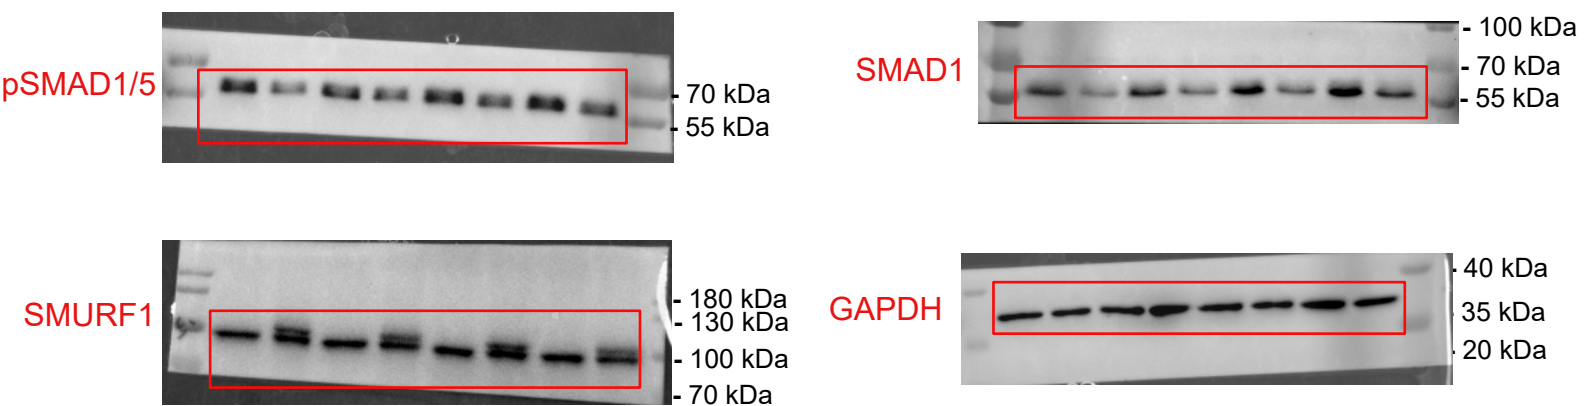



**F repeat 1**

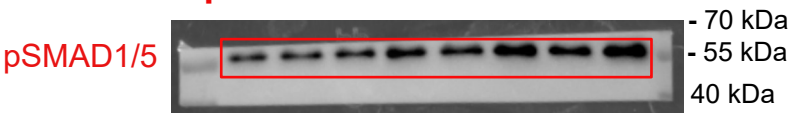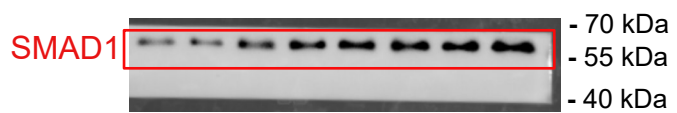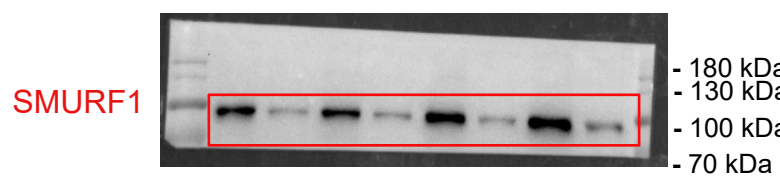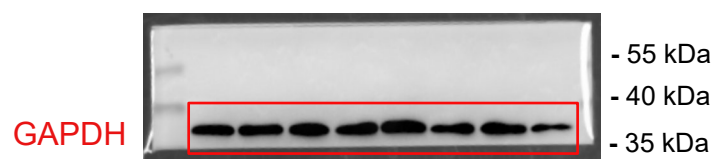

**repeat 2**

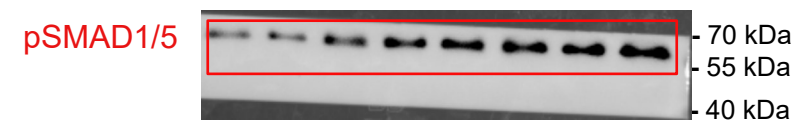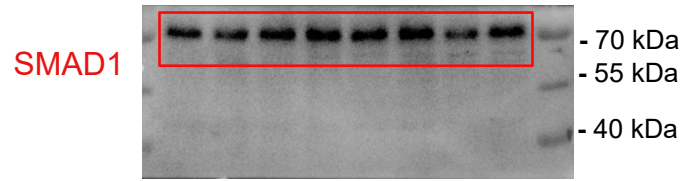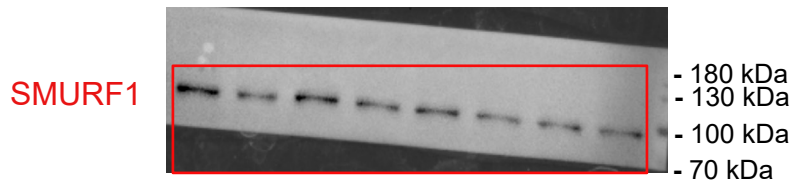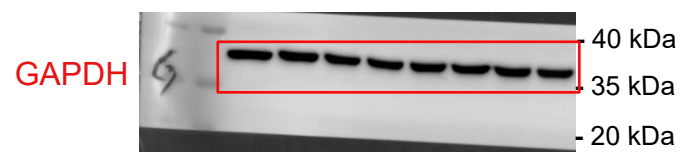

**Figure 4**

**B**

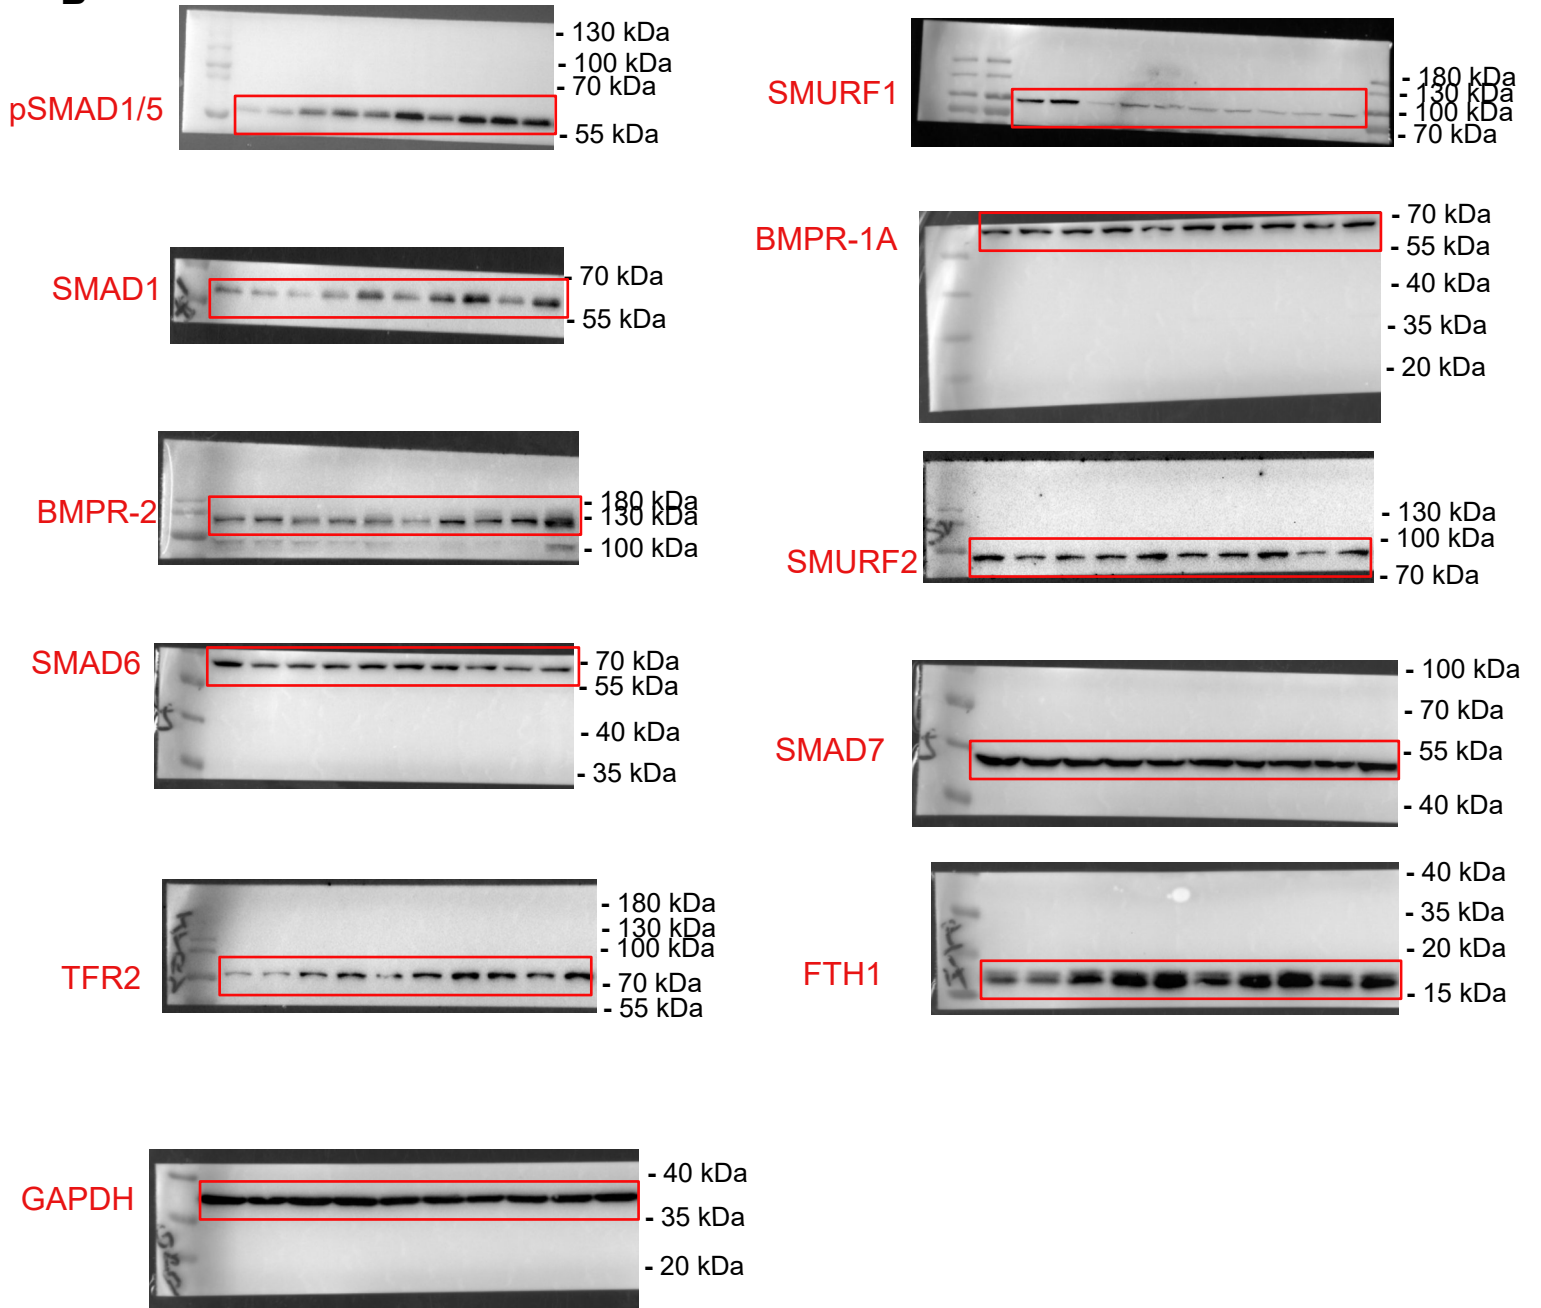

**Figure 4**

**C**

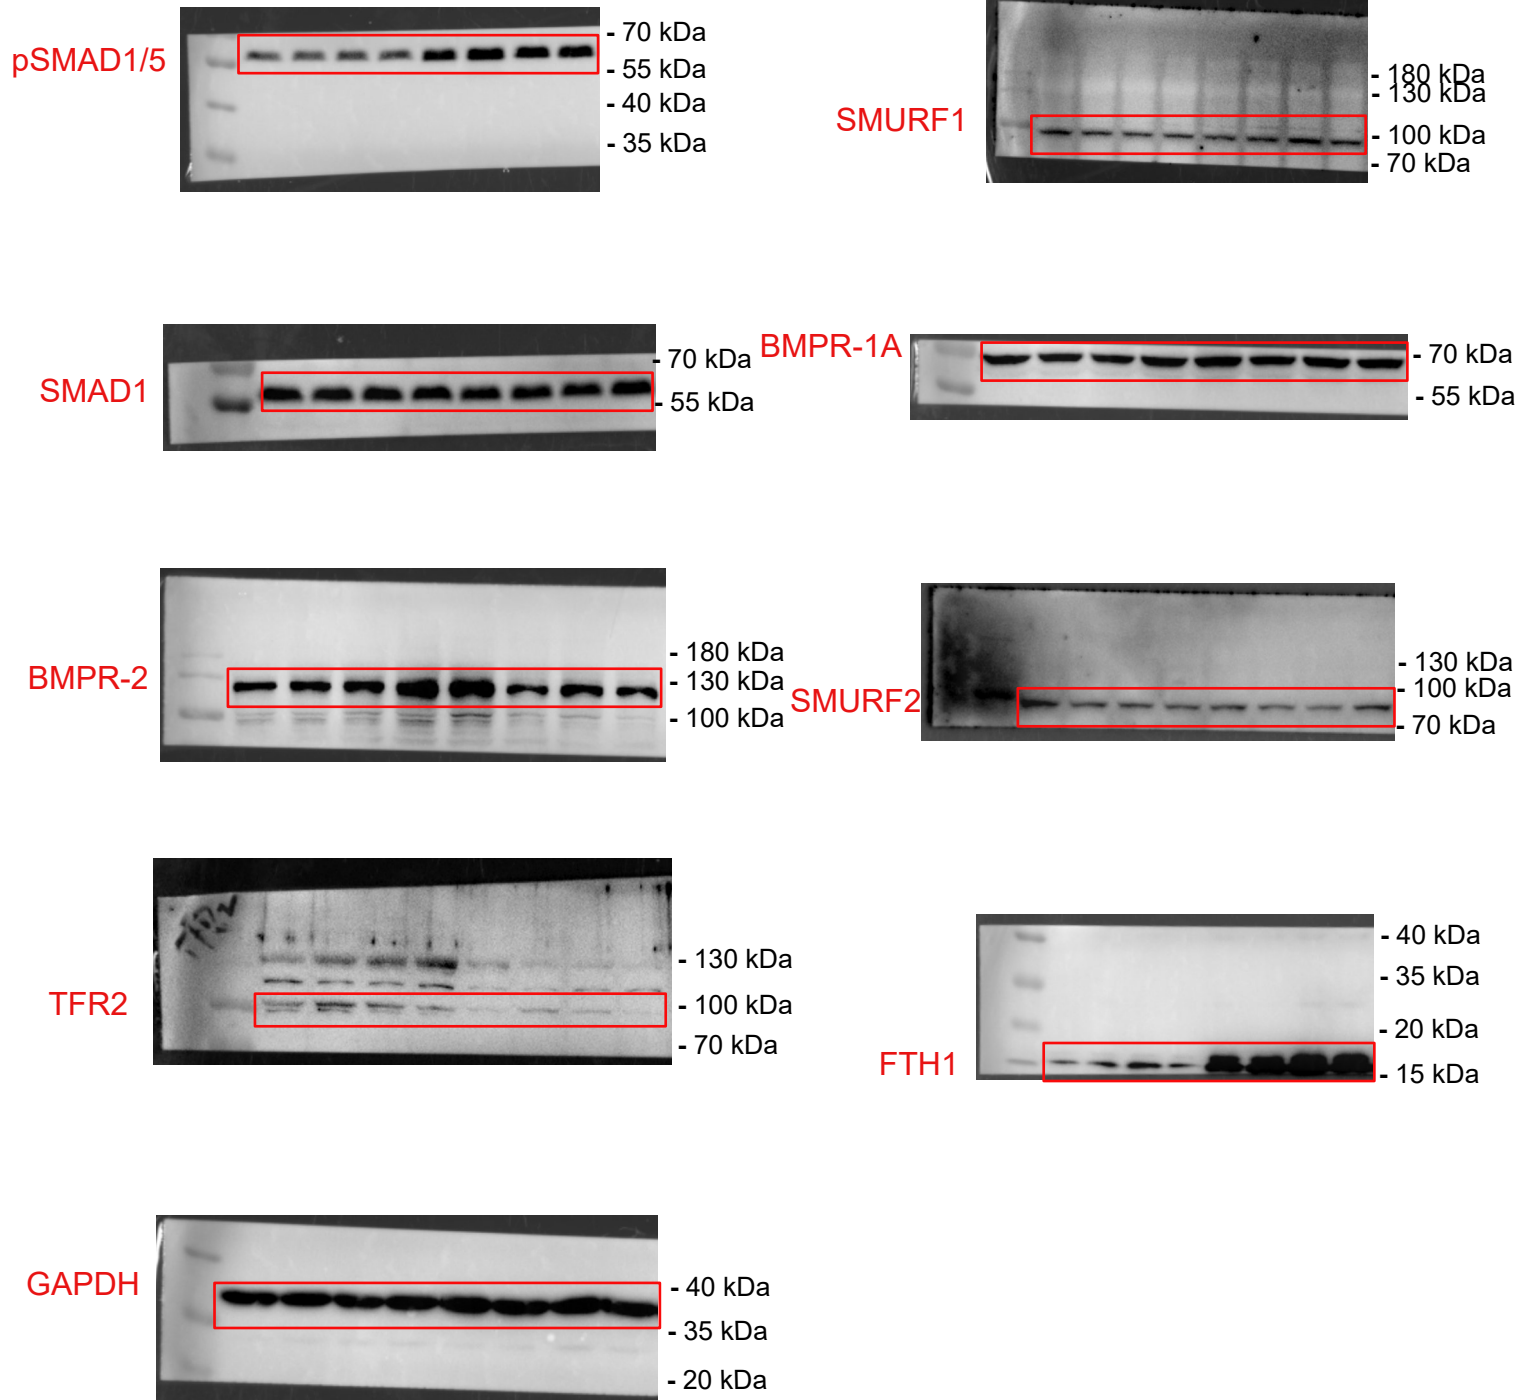

Supplement: JCTH-12-227-s001.pdf [file JCTH-12-227-s001.pdf]
