# Supplementary material for: Serum Iron Overload Activates the SMAD Pathway and Hepcidin Expression of Hepatocytes via SMURF1
Source: PubMed Central journal article supplement — J Clin Transl Hepatol. 2024 Feb 4;12(3):227–35. doi: 10.14218/JCTH.2023.00440 (PMC10899870; doi:10.14218/jcth.2023.00440), 2024-02-04
Supplement: JCTH-12-227-s003.pdf [file JCTH-12-227-s003.pdf]

**A**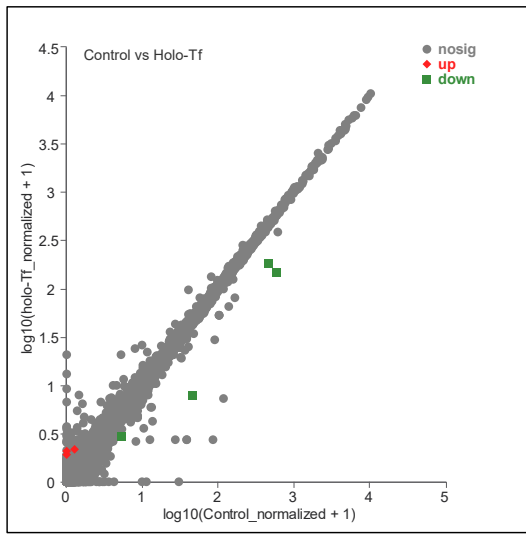**B**

| Gene_ID    | Product                                            | Log2Fold Change (Holo-Tf/Control) | P value     |
|------------|----------------------------------------------------|-----------------------------------|-------------|
| RN7SL1     | RNA, 7SL, cytoplasmic 1                            | -1.780434713                      | 1.33358E-18 |
| AC026786.1 | novel protein                                      | 8.30050076                        | 1.48182E-11 |
| RN7SL2     | RNA, 7SL, cytoplasmic 2                            | -1.079226806                      | 3.40885E-08 |
| RPPH1      | ribonuclease P RNA component H1                    | -2.534849949                      | 1.00143E-07 |
| AC245060.4 | BMS1, ribosome biogenesis factor (BSM1) pseudogene | 6.598334068                       | 1.00547E-06 |
| UPK3BL1    | uroplakin 3B like 1                                | -1.160981616                      | 6.25166E-06 |
| FSBP       | fibrinogen silencer binding protein                | 1.765059843                       | 4.61042E-05 |
