# Supplementary figures and images for: Serum Iron Overload Activates the SMAD Pathway and Hepcidin Expression of Hepatocytes via SMURF1
Source: PubMed Central journal article supplement — J Clin Transl Hepatol. 2024 Feb 4;12(3):227–35. doi: 10.14218/JCTH.2023.00440 (PMC10899870; doi:10.14218/jcth.2023.00440), 2024-02-04

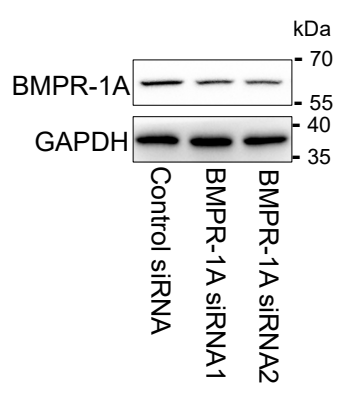

Supplement: JCTH-12-227-s002.pdf [file JCTH-12-227-s002.pdf]

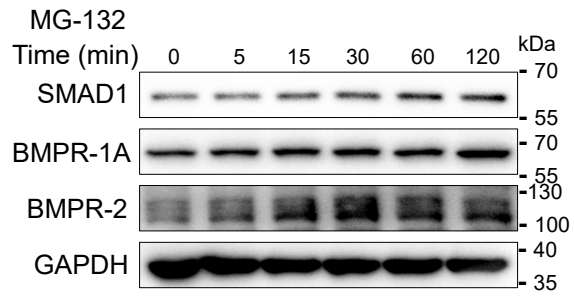

Supplement: JCTH-12-227-s004.pdf [file JCTH-12-227-s004.pdf]
